# Supplementary material for: Proton Conducting Organic-Inorganic Composite Membranes for All-Vanadium Redox Flow Battery
Source: MDPI journal article supplement (doi:10.3390/membranes13060574), 2023-06-01
Supplement: s1 [file s1]

## Supplementary Material

### Proton Conducting Organic-Inorganic Composite Membranes for All-Vanadium Redox Flow Battery

Sooraj Sreenath <sup>1,2</sup>, Nayanthara P. Sreelatha <sup>1</sup>, Chetan M. Pawar <sup>1,2</sup>, Vidhiben Dave <sup>1,2</sup>, Bhavana Bhatt <sup>1</sup>, Nitin G. Borle <sup>1</sup> and Rajaram Krishna Nagarale <sup>1,2,\*</sup>

<sup>1</sup> Electro Membrane Processes Laboratory, Membrane Science and Separation Technology Division, CSIR-Central Salt and Marine Chemicals Research Institute, Bhavnagar 364002, India; sooraj4993@gmail.com (S.S.); nayantharabiju2015@gmail.com (N.P.S.); chetanpawar085@gmail.com (C.M.P.); vidhidave009@gmail.com (V.D.); bhavanabhatt26@gmail.com (B.B.); nitinborle34@gmail.com (N.G.B.)

<sup>2</sup> Academy of Scientific and Innovative Research (AcSIR), Ghaziabad 201002, India

\* Correspondence: rknagarale@csmcri.res.in

### Supplementary Figures and Table

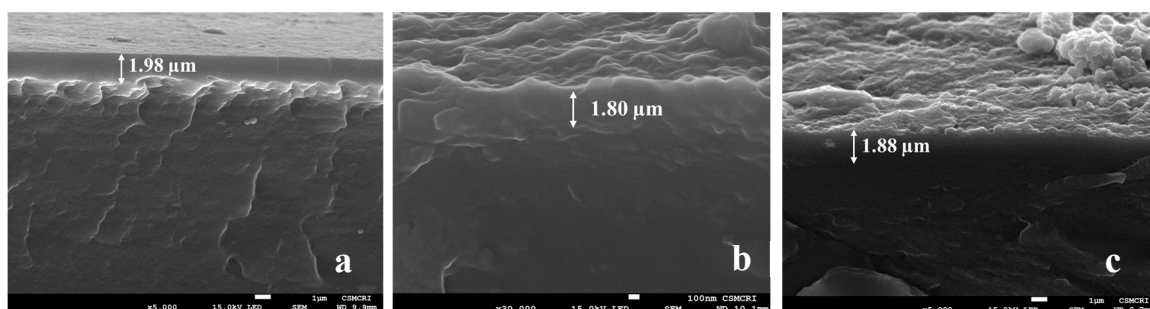

Figure S1. a-c, Cross-sectional SEM images of the membranes. PVA-SiO<sub>2</sub>-Si, b. PVA-SiO<sub>2</sub>-Zr and c. PVA-SiO<sub>2</sub>-Sn.

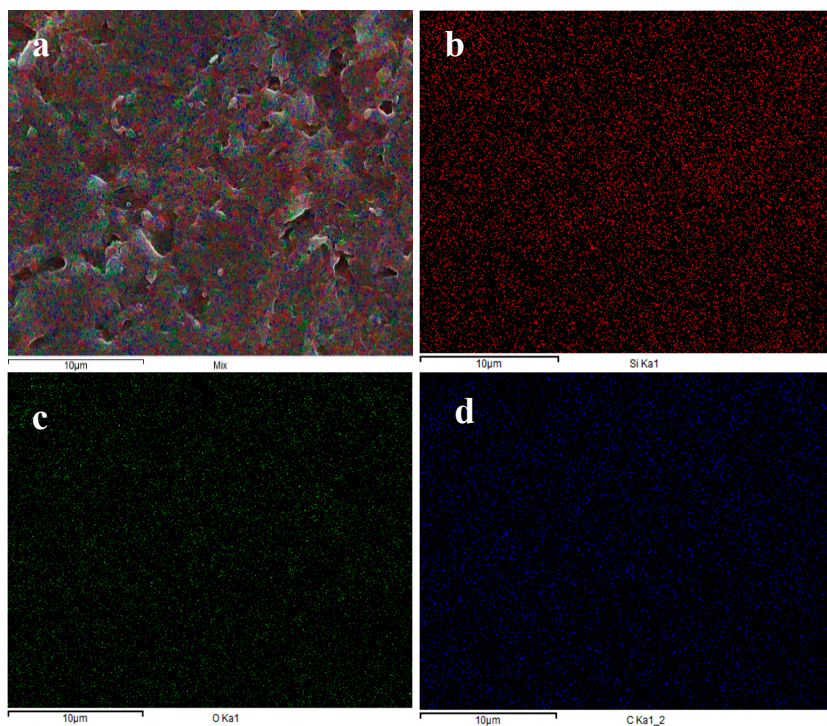

Figure S2: a. SEM image of PVA-SiO<sub>2</sub>-Si and b–d. corresponding elemental mapping of Silica, oxygen, and carbon of PVA-SiO<sub>2</sub>-Si.

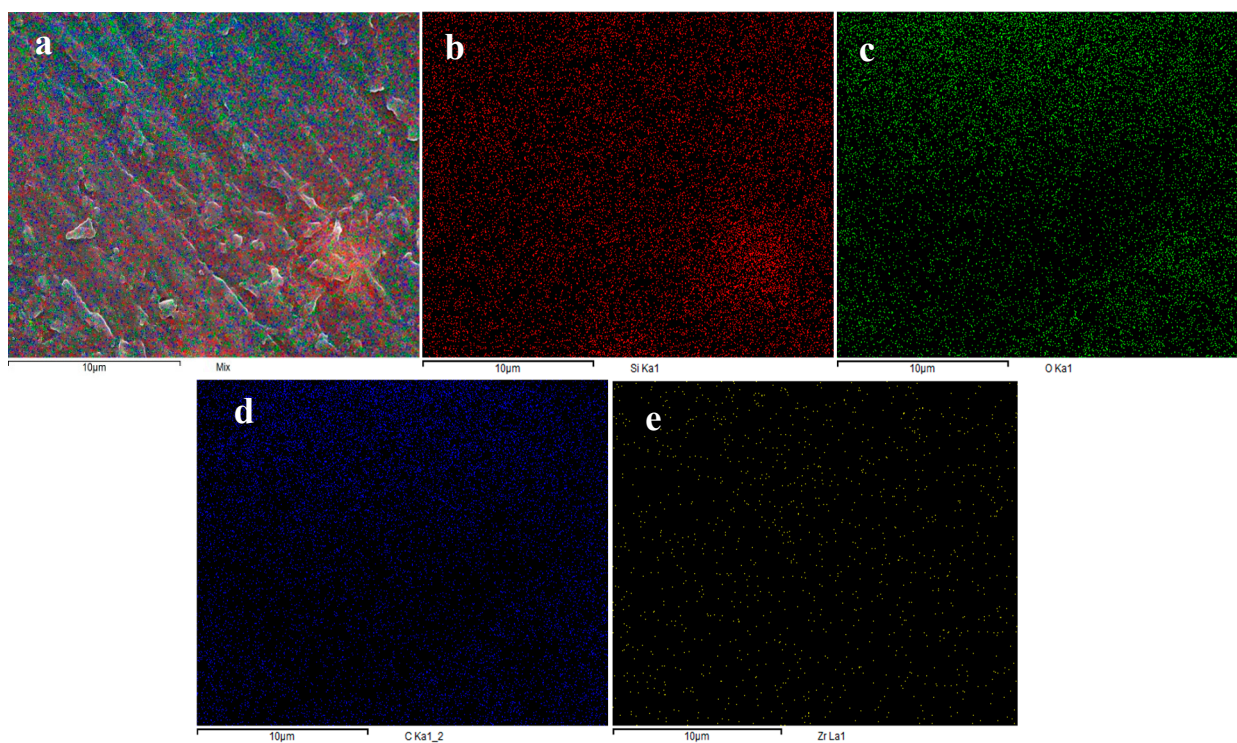

Figure S3: a. SEM image of PVA-SiO<sub>2</sub>-Zr and b–e. corresponding elemental mapping of Silica, oxygen, carbon, and zirconium of PVA-SiO<sub>2</sub>-Zr.

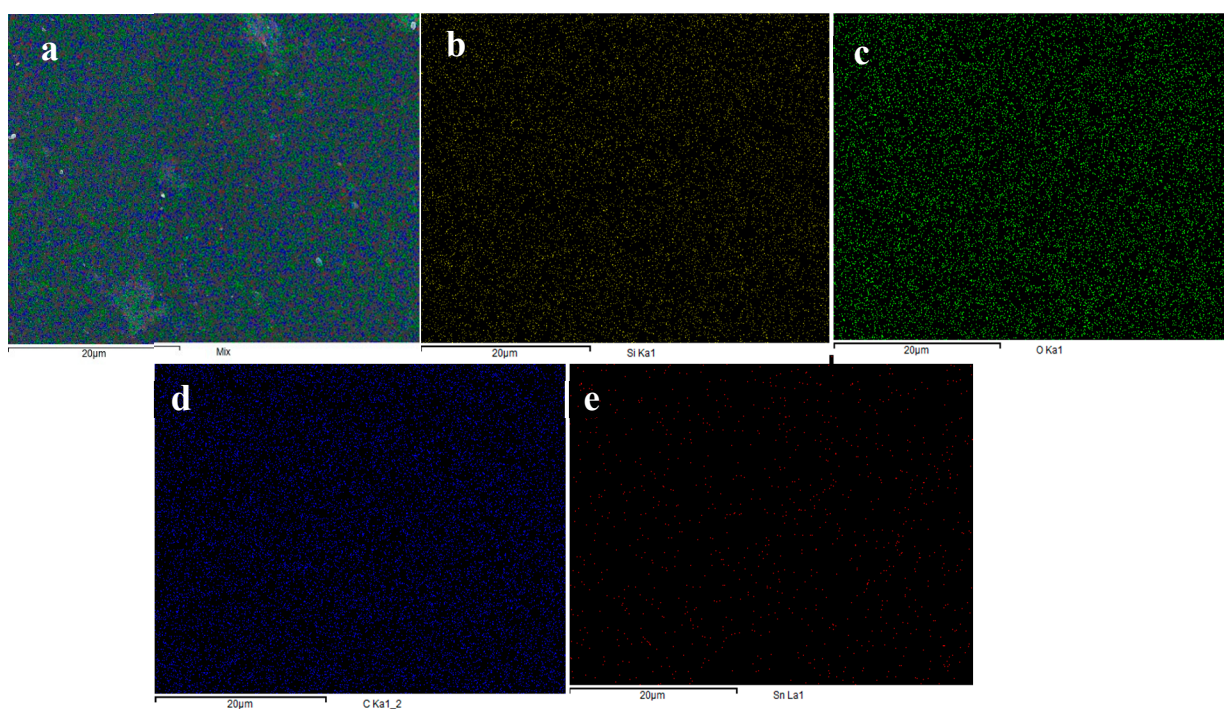

Figure S4: a. SEM image of PVA-SiO<sub>2</sub>-Sn and b–e. corresponding elemental mapping of Silica, oxygen, carbon, and tin of PVA-SiO<sub>2</sub>-Sn.

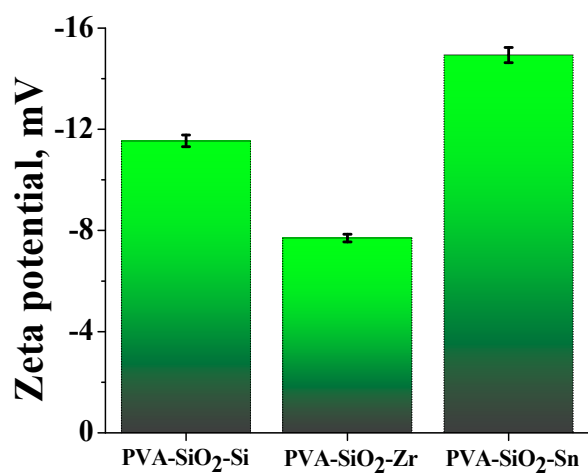

Figure S5. Zeta potential values of metal oxide coated PVA-SiO<sub>2</sub> membranes

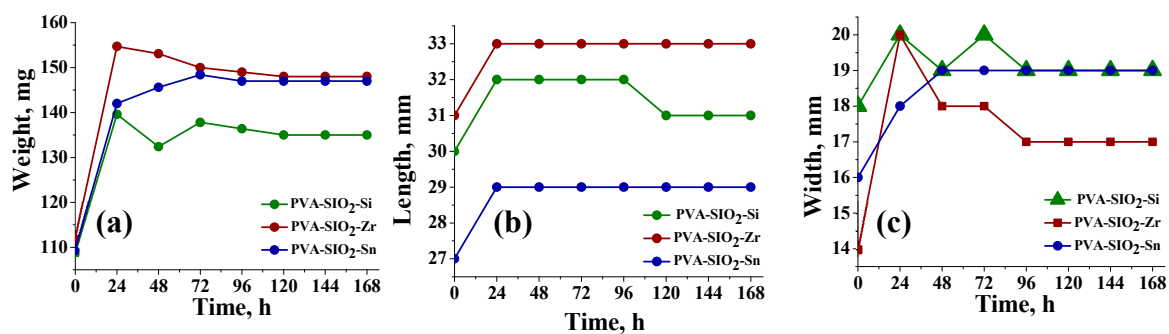

Figure S6: a. Weight; b. length and c. width of PVA-SiO<sub>2</sub>-Si, PVA-SiO<sub>2</sub>-Zr and PVA-SiO<sub>2</sub>-Sn membranes as function of immersing time in 1.5 M VO<sub>2</sub><sup>+</sup> dissolved in 2 M H<sub>2</sub>SO<sub>4</sub> solutions.

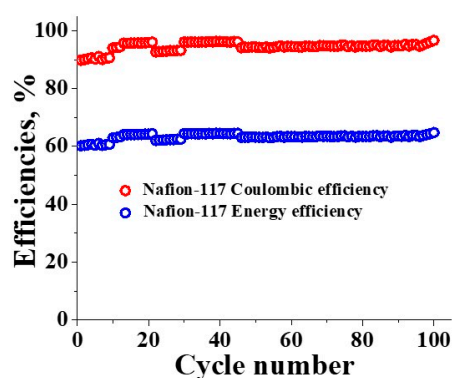

Figure S7. Cycling test of Nafion-117 at 100 mA cm<sup>-2</sup>

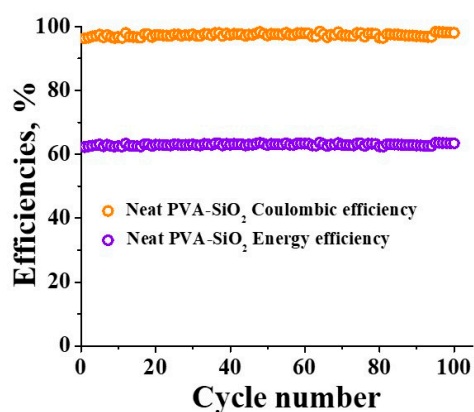

Figure S8. Cycling test of neat PVA-SiO<sub>2</sub> membrane at 100 mA cm<sup>-2</sup>

Table S1: Comparison of through-plane conductivity and sulfuric acid (2 M) uptake values of the metal oxide coated membranes before and after VRFB study.

| Membranes code           | Conductivity (mS cm <sup>-1</sup> ) |            | Conductivity retention after VRFB (%) | 2 M sulfuric acid uptake (%) |            | Water uptake retention after VRFB (%) |
|--------------------------|-------------------------------------|------------|---------------------------------------|------------------------------|------------|---------------------------------------|
|                          | Before VRFB                         | After VRFB |                                       | Before VRFB                  | After VRFB |                                       |
| PVA-SiO <sub>2</sub> -Si | 15.00                               | 12.90      | 86.00                                 | 95.0                         | 87.0       | 91.57                                 |
| PVA-SiO <sub>2</sub> -Zr | 12.28                               | 9.95       | 81.02                                 | 86.0                         | 80.0       | 93.02                                 |
| PVA-SiO <sub>2</sub> -Sn | 20.27                               | 18.94      | 93.43                                 | 89.0                         | 87.0       | 97.75                                 |
